# Supplementary material for: PiRNA-4447944 promotes castration-resistant growth and metastasis of prostate cancer by inhibiting NEFH expression through forming the piRNA-4447944-PIWIL2-NEFH complex
Source: PubMed Central journal article supplement (PMC11234203; doi:10.7150/ijbs.96173), 2024-07-01
Supplement: ijbsv20p3638s1.pdf [file ijbsv20p3638s1.pdf]

## Supplementary Figures

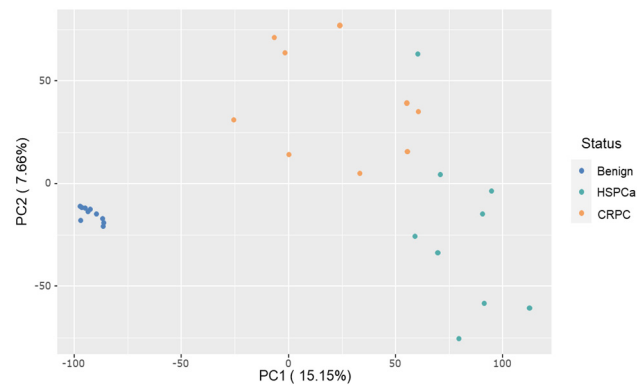

Figure S1: Principal component analysis (PCA) was performed on the small RNA sequencing data according to the expression levels of piRNAs in different groups of tissue samples, including benign, HSPCa and CRPC.

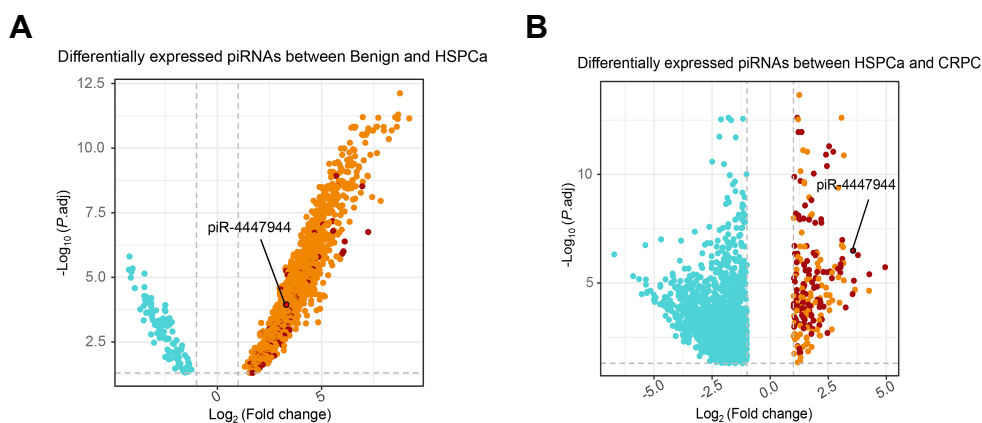

Figure S2: Volcano plot of differentially expressed piRNAs in HSPCa vs. Benign (A) and CRPC vs. HSPCa (B). The horizontal dashed line represents the adj. p-value cutoff (0.05) for differentially expressed piRNAs. The vertical dashed line represents the fold change cutoff ( $\geq 2$  or  $\leq -2$ ) of differentially expressed piRNAs. Upregulated piRNAs are indicated in orange, downregulated piRNAs are indicated in cyan. The simultaneously upregulated piRNAs in CRPC vs HSPCa (A) or HSPCa vs Benign (B) are represented in red.

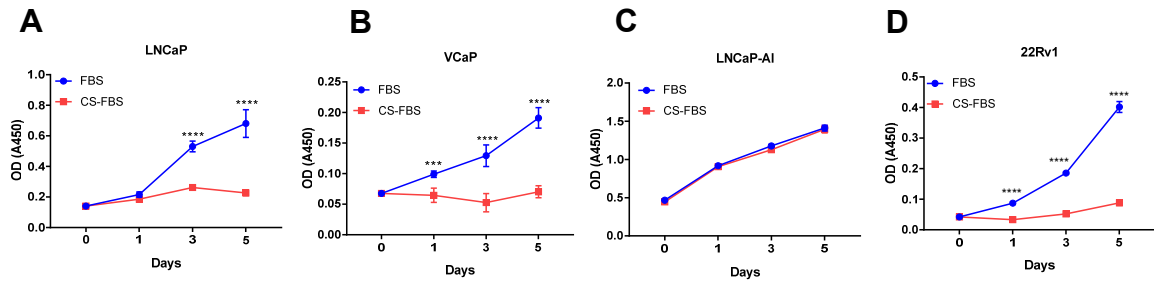

Figure S3: The characters of PCa cell lines under androgen-deprived conditions (in 10% CS-FBS medium) or normal culture conditions (in 10% FBS medium) were detected by cell viability assay. A-B, Proliferation rates of LNCaP cells and VCaP cells were significantly inhibited under androgen-deprived conditions, which demonstrated significant androgen-dependent character. C, LNCaP-AI cells were still able to grow in an androgen-deprived environment, validating its castration-resistant character. D, 22RV1 cells showed strong sensitivity to androgen-deprivation, implying its androgen-responsive character.

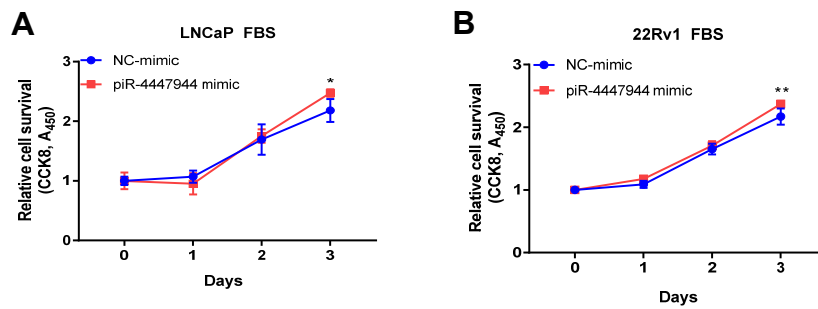

Figure S4: Effect of piR-4447944 overexpression on cell viability of LNCaP cells (A) and 22Rv1 cells (B) under normal culture condition (10% FBS) was determined by CCK8 assay.

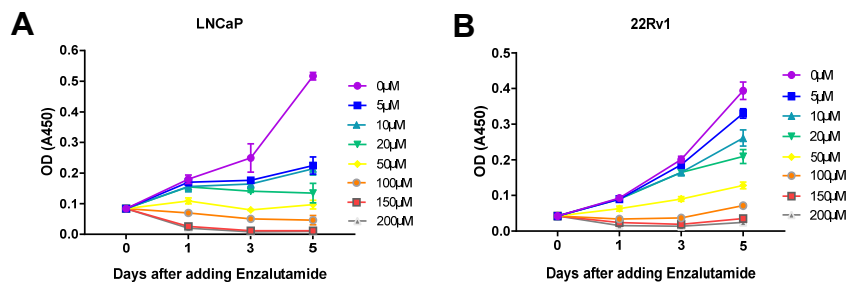

Figure S5: Effect of enzalutamide treatment on cell viability of LNCaP cells (A) and 22Rv1 cells (B). PCa cells were treated with a dose range of 5 μM to 200 μM enzalutamide or 0 μM (DMSO). Cell viability was evaluated at indicated post-treatment time by CCK8 assay.

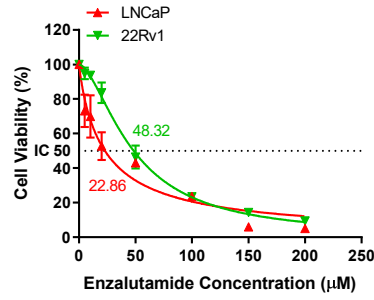

Figure S6: Calculation of the IC<sub>50</sub> of enzalutamide in LNCaP cells and 22Rv1 cells for 48 h. The IC<sub>50</sub> value was calculated using a nonlinear regression analysis in GraphPad Prism 8.0.

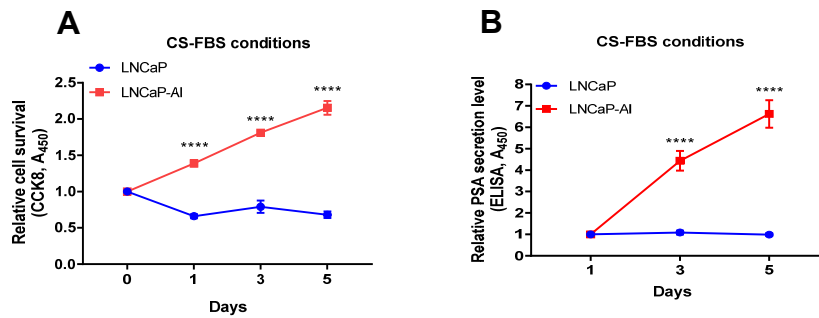

Figure S7: Biological characteristic differences between LNCaP and LNCaP-AI cells. A, In androgen-deprived medium, the proliferation of LNCaP-AI cells was significantly higher than that of LNCaP cells. B, In androgen-deprived medium, the PSA secretion ability of LNCaP-AI cells was not affected, but the PSA secretion of LNCaP cells was significantly inhibited.

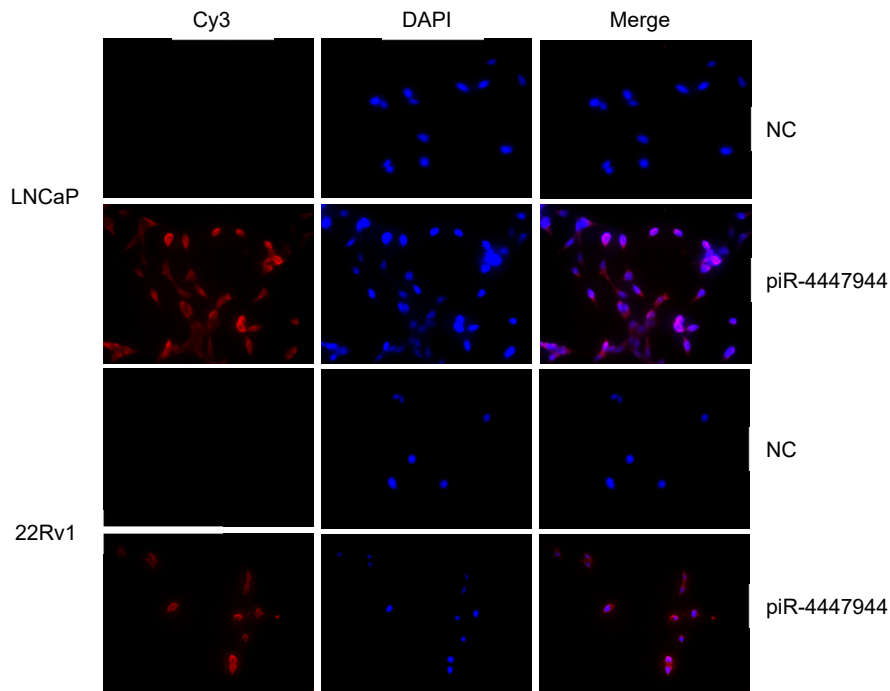

Figure S8: FISH assay shows that piR-4447944 is mainly distributed in the cytoplasm of LNCaP cells and 22Rv1 cells. DAPI stains the nucleus in blue, and the probe label of piR-4447944 is labeled with Cy3 and stains red. NC, negative control.

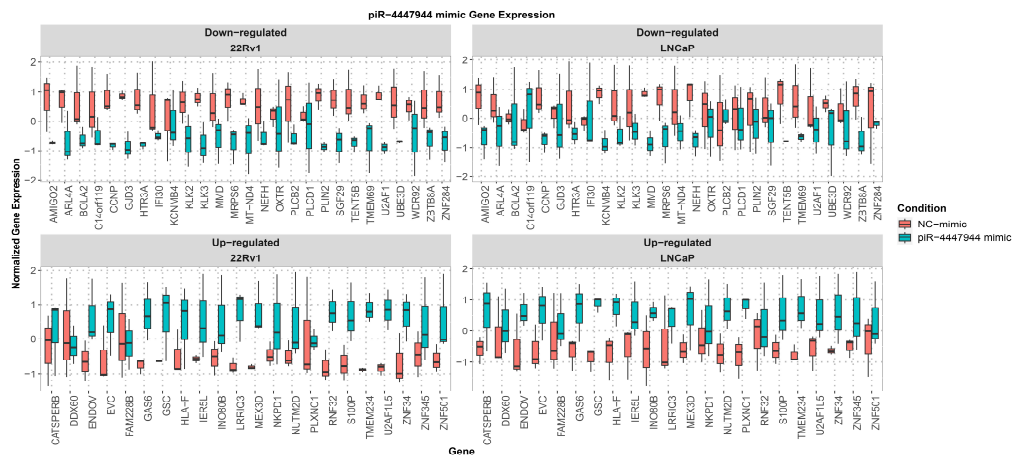

Figure S9: Boxplot depicting the expression values of DEGs between piR-4447944 overexpression group and control group in LNCaP cells and 22Rv1 cells based on the mRNA sequencing results. Expression value shown as a Z score of the normalized TPM.

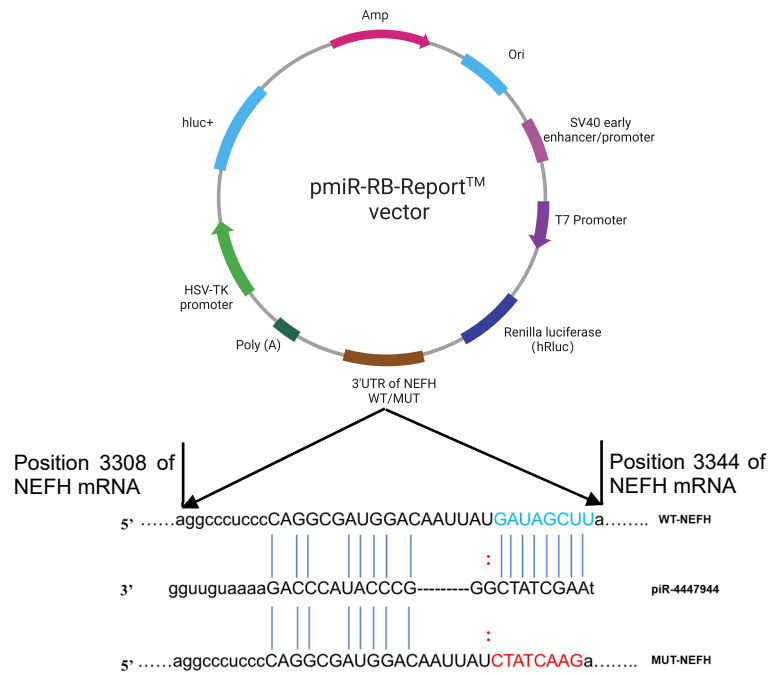

Figure S10: Schematic representation of wild-type (WT) and mutant (MT) NEFH 3'UTR luciferase reporter constructs. The piR-4447944 wild-type binding sites within the 3'UTR of NEFH were indicated in blue, and the mutant binding sites in red. This graph created by Biorender.com.

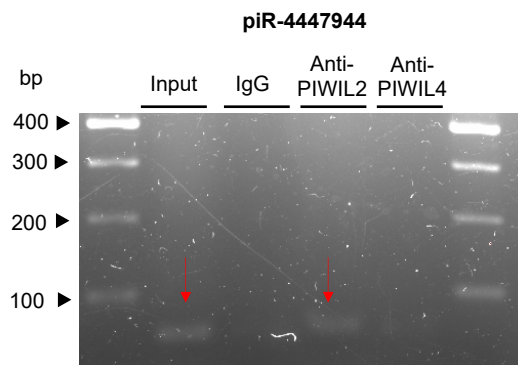

Figure S11: Specific interaction of piR-4447944 and PIWIL2 protein in 22Rv1 cells was confirmed by RIP using anti-PIWIL2 or anti-PIWIL4 antibodies, and rabbit IgG was used as a control antibody. Red arrow indicated the presence of piR-4447944 in the precipitate detected by electrophoresis on 3% agarose gel after RT-PCR.

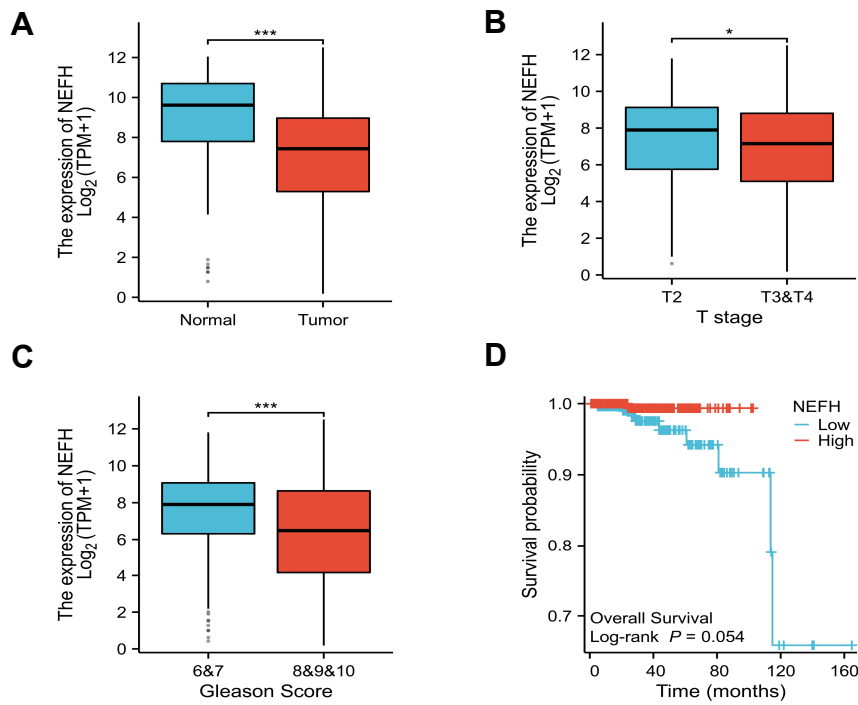

Figure S12: Low NEFH expression correlates with advanced disease and poor prognosis in PCa. A, NEFH was expressed at a lower level in PCa tissues than in normal prostate tissues. B-C, Low NEFH expression was associated with advanced T stages and poor differentiation (high Gleason score) in PCa. D, Low-NEFH expression group showed a strong tendency to be associated with poor OS in PCa ( $p=0.054$ ).

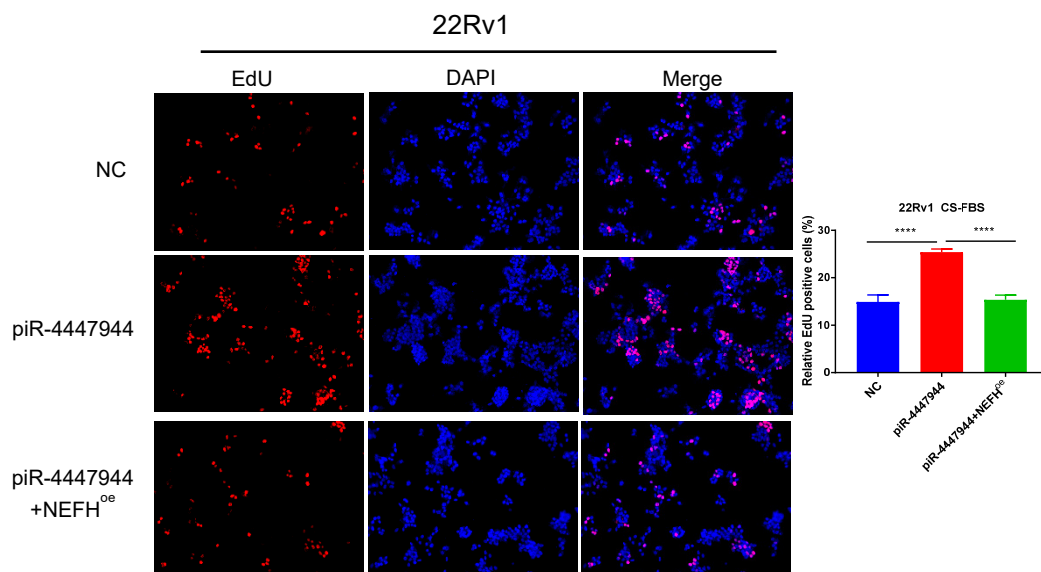

Figure S13: EdU incorporation assay validated that restoration of NEFH expression attenuated the proliferation ability of piR-4447944-transfected 22Rv1 cells in an androgen-deprivation environment.

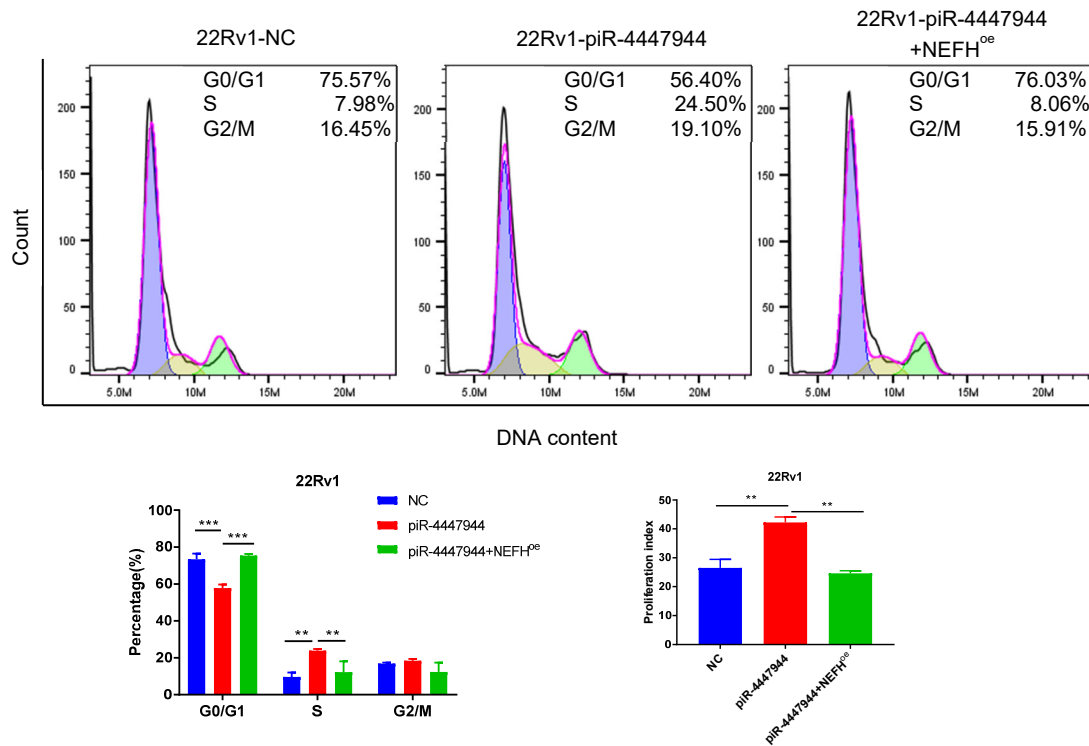

Figure S14: Cell cycle assay showed that NEFH overexpression induced cellular S-phase arrest and reduced cell proliferation index in piR-4447944-overexpressed 22Rv1 cells under androgen-deprived conditions. Cell proliferation index was calculated as  $(S+G2/M)/(G0/G1+S+G2/M) \times 100\%$ .

## Supplementary Tables

**Table S1: Clinical features of patient cases in this study**

| Patient Number | Age | Gleason Score | Stage | Tumor Type | PSA (ng/ml) | TNM Stage | Treatment        | Sample type              | Biopsy date/TURP date |
|----------------|-----|---------------|-------|------------|-------------|-----------|------------------|--------------------------|-----------------------|
| 1              | 63  |               |       | Benign     | 3.92        |           |                  | Fresh sample from Biopsy | 07/10/2020            |
| 2              | 73  |               |       | Benign     | 8.4         |           |                  | Fresh sample from Biopsy | 21/10/2020            |
| 3              | 62  |               |       | Benign     | 7.4         |           |                  | Fresh sample from Biopsy | 11/11/2020            |
| 4              | 60  |               |       | Benign     | 8.2         |           |                  | Fresh sample from Biopsy | 25/11/2020            |
| 5              | 66  |               |       | Benign     | 7.7         |           |                  | Fresh sample from Biopsy | 25/11/2020            |
| 6              | 58  |               |       | Benign     | 5.3         |           |                  | Fresh sample from Biopsy | 14/12/2020            |
| 7              | 71  |               |       | Benign     | 5.4         |           |                  | Fresh sample from Biopsy | 14/12/2020            |
| 8              | 71  |               |       | Benign     | 7.7         |           |                  | Fresh sample from Biopsy | 21/10/2020            |
| 9              | 70  |               |       | Benign     | 9           |           |                  | Fresh sample from Biopsy | 04/11/2020            |
| 10             | 66  |               |       | Benign     | 5           |           |                  | Fresh sample from Biopsy | 11/11/2020            |
| 11             | 79  | 4+4           | IV    | HSPCa      | 51.2        | T4N0M0    | GnRH agonists    | FFPE sample from Biopsy  | 15/01/2020            |
| 12             | 75  | 4+5           | IV    | HSPCa      | 1861        | T2cN0M1   | GnRH agonists    | FFPE sample from Biopsy  | 23/11/2016            |
| 13             | 84  | 4+5           | III   | HSPCa      | 80.4        | T3aN0M0   | GnRH antagonists | FFPE sample from Biopsy  | 01/06/2017            |
| 14             | 59  | 4+5           | IV    | HSPCa      | 54          | T4N1M0    | GnRH agonists    | FFPE sample from Biopsy  | 16/04/2010            |
| 15             | 83  | 4+5           | IV    | HSPCa      | 261         | T4N0M0    | BXO              | FFPE sample from Biopsy  | 14/08/2014            |
| 16             | 76  | 4+5           | III   | HSPCa      | 9.9         | T3N0M0    | BXO              | FFPE sample from Biopsy  | 29/11/2011            |
| 17             | 81  | 4+5           | III   | HSPCa      | 145         | T3N0M0    | LHRH agonist     | FFPE sample from Biopsy  | 06/04/2011            |
| 18             | 73  | 3+4           | IV    | HSPCa      | 494         | T4N0M1    | LHRH agonist     | FFPE sample from Biopsy  | 12/08/2010            |
| 19             | 72  | 4+5           | III   | HSPCa      | 121         | T3N0M0    | BXO              | FFPE sample from Biopsy  | 04/03/2010            |
| 20             | 66  | 5+5           | IV    | HSPCa      | 2647        | T3N1M1    | GnRH antagonists | FFPE sample from Biopsy  | 30/11/2016            |
| 21             | 81  | 5+5           | IV    | HSPCa      | 776         | TxN0M1    | BXO              | FFPE sample from Biopsy  | 03/02/2016            |
| 22             | 67  | 5+5           | IV    | HSPCa      | 2105        | T2cN0M1   | BXO              | FFPE sample from Biopsy  | 11/01/2017            |
| 23             | 81  | 5+5           | IV    | HSPCa      | 13.2        | T3bN0M1   | GnRH agonists    | FFPE sample from Biopsy  | 15/02/2017            |
| 24             | 75  | 5+5           | IV    | HSPCa      | 625         | T4N1M1    | GnRH agonists    | FFPE sample from Biopsy  | 12/07/2017            |



|    |    |     |    |       |      |         |                            |                               |            |
|----|----|-----|----|-------|------|---------|----------------------------|-------------------------------|------------|
|    |    |     |    |       |      |         |                            |                               |            |
| 25 | 78 | 4+5 | IV | HSPCa | 214  | T3bN1M1 | GnRH antagonists           | FFPE sample from Biopsy       | 16/08/2017 |
| 26 | 53 | 5+5 | IV | HSPCa | 73.4 | T3N1M1  | GnRH antagonists           | FFPE sample from Biopsy       | 29/11/2017 |
| 27 | 76 | 5+4 | IV | HSPCa | 1334 | T3bN1M1 | GnRH antagonists           | FFPE sample from Biopsy       | 09/11/2020 |
| 28 | 74 | 4+5 | IV | HSPCa | 195  | T2cN1M0 | GnRH antagonists           | FFPE sample from Biopsy       | 23/11/2020 |
| 29 | 84 | 4+5 | IV | HSPCa | 250  | T3bN1M1 | LHRH agonist +Enzalutamide | FFPE sample from Biopsy       | 30/12/2020 |
| 30 | 70 | 4+5 | IV | HSPCa | 2058 | TxN0M1  | GnRH antagonists           | FFPE sample from Biopsy       | 30/12/2020 |
| 31 | 80 | 5+4 | IV | CRPC  | 11   | T4N0M1  | Enzalutamide               | FFPE sample from TURP removal | 10/08/2020 |
| 32 | 78 | 4+5 | IV | CRPC  | 2086 | T2cN0M1 | Enzalutamide               | FFPE sample from TURP removal | 06/11/2019 |
| 33 | 87 | 4+5 | IV | CRPC  | 20.7 | T4N0M0  | Bicalutamide               | FFPE sample from TURP removal | 09/09/2019 |
| 34 | 68 | 4+5 | IV | CRPC  | 226  | T4N1M1  | Chemotherapy               | FFPE sample from TURP removal | 19/09/2018 |
| 35 | 84 | 5+4 | IV | CRPC  | 395  | T4N0M1  | Radiotherapy               | FFPE sample from TURP removal | 06/07/2015 |
| 36 | 80 | 5+4 | IV | CRPC  | 16.5 | T4N0M1  | Bicalutamide               | FFPE sample from TURP removal | 03/03/2015 |
| 37 | 85 | NA  | IV | CRPC  | 11.3 | T3N1M1  | Bicalutamide               | FFPE sample from TURP removal | 14/01/2015 |
| 38 | 77 | 4+4 | IV | CRPC  | 945  | T4N0M1  | Radiotherapy               | FFPE sample from TURP removal | 06/08/2014 |
| 39 | 76 | 5+4 | IV | CRPC  | 150  | T4N1M1  | Abiraterone                | FFPE sample from TURP removal | 06/01/2014 |
| 40 | 88 | 5+4 | IV | CRPC  | 557  | T2cN1M1 | Abiraterone                | FFPE sample from TURP removal | 06/07/2020 |
| 41 | 67 | 5+5 | IV | CRPC  | 7.8  | T3aN0M1 | Bicalutamide               | FFPE sample from TURP removal | 22/06/2020 |
| 42 | 81 | 4+4 | IV | CRPC  | 22.6 | T4N0M1  | Abiraterone                | FFPE sample from TURP removal | 10/12/2018 |
| 43 | 89 | 5+5 | IV | CRPC  | 223  | TxN0M1  | NA                         | FFPE sample from TURP removal | 03/03/2017 |
| 44 | 85 | 5+4 | IV | CRPC  | 830  | TxN0M1  | BXO                        | FFPE sample from TURP removal | 20/07/2016 |

|    |    |     |     |      |      |         |                            |                               |            |
|----|----|-----|-----|------|------|---------|----------------------------|-------------------------------|------------|
| 45 | 68 | 5+5 | IV  | CRPC | 46.7 | T4N1M1  | Chemotherapy +Bicalutamide | FFPE sample from TURP removal | 20/04/2016 |
| 46 | 68 | 5+4 | IIB | CRPC | 32.9 | T2cN0M0 | Bicalutamide               | FFPE sample from TURP removal | 23/12/2015 |
| 47 | 79 | 4+5 | IV  | CRPC | 1771 | TxNxM1  | NA                         | FFPE sample from TURP removal | 11/12/2018 |
| 48 | 75 | 4+5 | IV  | CRPC | 205  | T3N0M1  | Abiraterone                | FFPE sample from TURP removal | 30/03/2021 |
| 49 | 66 | 5+4 | IV  | CRPC | 307  | T4NxM1  | Abiraterone                | FFPE sample from TURP removal | 14/05/2018 |
| 50 | 80 | NA  | IV  | CRPC | 71   | T2cN0M1 | Abiraterone                | FFPE sample from TURP removal | 11/11/2016 |

For the screening cohort (small RNA sequencing), we used benign prostate tissues No.1-10, HSPCa tissues No.11-19, and CRPC tissues No.31-39 (No.11-19 and No.31-39 cases were paired HSPCa tissues and CRPC tissues); For the validation cohort, candidate piRNAs were validated in 10 benign prostate tissues (No. 1-10), 20 HSPCa tissues (No.11-30) and 20 CRPC tissues (No.31-50).

BXO: bilateral orchiectomy; FFPE: formalin-fixed paraffin-embedded; GnRH: Gonadotropin hormone-releasing hormone; LHRH: luteinizing hormone-releasing hormone; NA: not available, TURP: transurethral resection of the prostate.

**Table S2: The sequences of piRNAs for Taqman RT-qPCR**

| piRNA name  | Sequence 5'-3'                     |
|-------------|------------------------------------|
| piR-2545834 | TGGCAAGAAATGGGCTACATTTTCTCC        |
| piR-908852  | ATTTCTTCCCACCTCATGAGCTACA          |
| piR-60094   | AAACTGGGATTAGATACCCCACTGTGCTTAGCCC |
| piR-2651524 | TAGGTCAAGGTGTAGCCCATAGGT           |
| piR-4447944 | TAAGCTATCGGGCCCATACCCAGAAAATGTTGG  |
| piR-4419185 | TAGGGTTTACGATCTCGATGTTGGATCAGGAC   |
| piR-2856682 | CTGCTCACCAGTGGGCACTTGCAGGACGAGCACT |
| piR-597820  | TGTATAAATAAGGATTATCCTGGGCATA       |
| piR-1207232 | AGGTCAAGGTGTAGCTCATGAGGTGGC        |
| piR-2715339 | TGACTAACGGAACAAGTTACCCTAGG         |

**Table S3: Primers for mRNA RT-qPCR**

| Primers  | Forward (5'-3')       | Reverse (5'-3')       |
|----------|-----------------------|-----------------------|
| NEFH     | GCACTGAAAAGCACCAAGGA  | AGCCAATCCGACACTCTCA   |
| PLCD1    | CCAGCCACTTAGCCACTACC  | GAAGGCATAGTCCCGGATGG  |
| PLIN2    | GGCAGGCGACATCTACTCAG  | GCACCTTGGTCCTGAGCATT  |
| TENT5B   | CCACTCCTTTCCCCCTTGTG  | GGGTGGGAACGTTGACTTGA  |
| U2AF1    | TCTGTGACAACCTGGGAGAC  | AGCTCTCTGGAAATGGGCTT  |
| GJD3     | CTTCCTACTTGCGGGCATTTC | AACTCAGAAGGACAGGGTGG  |
| AR       | GGAGGCGACAGAGGGAAAAAG | CCTCCGAGTCTTTAGCAGCTT |
| KLK3/PSA | CAAGACTCAAGCCTCCCCAG  | GCCAGTATTCCCAGGACAC   |
| GAPDH    | CCCACTCCTCCACCTTTGAC  | GGAGATTCAAGTGTGGTGGGG |

**Table S4: The clean reads distribution of small RNA sequencing in each sample**

| Patient Number | All Qualified Reads | miRNA Mapping Reads | miRNA Mapping Rate (%) | piRNA Mapping Reads | piRNA Mapping Rate (%) | Others Reads | Others Mapping Rate (%) |
|----------------|---------------------|---------------------|------------------------|---------------------|------------------------|--------------|-------------------------|
| Benign_1       | 27100318            | 22350392            | 82.473                 | 362840              | 1.34                   | 4387086      | 16.19                   |
| Benign_2       | 26233125            | 21814906            | 83.158                 | 302788              | 1.15                   | 4115431      | 15.69                   |
| Benign_3       | 24988367            | 20520209            | 82.119                 | 274102              | 1.1                    | 4194056      | 16.78                   |
| Benign_4       | 25890443            | 22267046            | 86.005                 | 302520              | 1.17                   | 3320877      | 12.83                   |
| Benign_5       | 25567067            | 21121192            | 82.611                 | 403862              | 1.58                   | 4042013      | 15.81                   |
| Benign_6       | 23903690            | 19824667            | 82.936                 | 272302              | 1.14                   | 3806721      | 15.93                   |
| Benign_7       | 25772632            | 21547749            | 83.607                 | 239723              | 0.93                   | 3985160      | 15.46                   |
| Benign_8       | 25810865            | 21466594            | 83.169                 | 337179              | 1.31                   | 4007092      | 15.52                   |
| Benign_9       | 25218962            | 20234420            | 80.235                 | 339680              | 1.35                   | 4644862      | 18.42                   |
| Benign_10      | 25263327            | 19044293            | 75.383                 | 250967              | 0.99                   | 5968067      | 23.62                   |
| HSPCa_11       | 23898003            | 13624792            | 57.012                 | 414415              | 1.73                   | 9858796      | 41.25                   |
| HSPCa_12       | 24350890            | 10098861            | 41.472                 | 309057              | 1.27                   | 13942972     | 57.26                   |
| HSPCa_13       | 24901521            | 12611650            | 50.646                 | 375663              | 1.51                   | 11914208     | 47.85                   |
| HSPCa_14       | 23881073            | 6024143             | 25.226                 | 266673              | 1.12                   | 17590257     | 73.66                   |
| HSPCa_15       | 23950552            | 8825219             | 36.848                 | 391382              | 1.63                   | 14733951     | 61.52                   |
| HSPCa_16       | 24018704            | 10139642            | 42.216                 | 301381              | 1.25                   | 13577681     | 56.53                   |
| HSPCa_17       | 23956058            | 8123676             | 33.911                 | 290499              | 1.21                   | 15541883     | 64.88                   |
| HSPCa_18       | 23853916            | 6160442             | 25.826                 | 186047              | 0.78                   | 17507427     | 73.39                   |
| HSPCa_19       | 23854805            | 9014382             | 37.789                 | 288926              | 1.21                   | 14551497     | 61.00                   |

|         |          |          |        |        |      |          |       |
|---------|----------|----------|--------|--------|------|----------|-------|
| CRPC_31 | 24776830 | 9692976  | 39.121 | 228649 | 0.92 | 14855205 | 59.96 |
| CRPC_32 | 24897893 | 13881942 | 55.755 | 326932 | 1.31 | 10689019 | 42.93 |
| CRPC_33 | 23970405 | 16112234 | 67.217 | 394509 | 1.65 | 7463662  | 31.14 |
| CRPC_34 | 23944764 | 8695987  | 36.317 | 218800 | 0.91 | 15029977 | 62.77 |
| CRPC_35 | 24005558 | 9057754  | 37.732 | 249452 | 1.04 | 14698352 | 61.23 |
| CRPC_36 | 24084154 | 7563198  | 31.403 | 223185 | 0.93 | 16297771 | 67.67 |
| CRPC_37 | 22552518 | 7451607  | 33.041 | 399073 | 1.77 | 14701838 | 65.19 |
| CRPC_38 | 24056624 | 7930027  | 32.964 | 263768 | 1.1  | 15862829 | 65.94 |
| CRPC_39 | 23990386 | 7657374  | 31.919 | 217897 | 0.91 | 16115115 | 67.17 |

**Table S5: The sequences of piRNA mimic/inhibitor for transfection**

| piRNA mimics          | Sequence (5'-3')                                                                                        |
|-----------------------|---------------------------------------------------------------------------------------------------------|
| piR-4447944 mimic     | UAAGCUAUCGGGCCCAUACCCAGAAAAUGUUGG with monophosphate at the 5' ends and 2'-O-methylation at the 3'-ends |
| NC-mimic              | UUUGUACUACACAAAAGUACUG with monophosphate at the 5' ends and 2'-O-methylation at the 3'-ends            |
| piRNA inhibitors      | Sequence (5'-3')                                                                                        |
| piR-4447944 inhibitor | CCAACAUUUUCUGGGUAUGGGCCCGAUAGCUUA with 2'-O-methylation modification                                    |
| NC-inhibitor          | UCACAACCUCUAGAAAGAGUAGA with 2'-O-methylation modification                                              |

**Table S6: Antibodies related to western blot and flow cytometry**

| Antibodies                  | Dilution and Source                |
|-----------------------------|------------------------------------|
| FITC Annexin V              | 5ul/test; BD Biosciences # 556547  |
| Propidium Iodide (50 µg/ml) | 5ul/test; BD Biosciences #556547   |
| PI/RNase Staining Buffer    | 500ul/test; BD Biosciences #550825 |
| AR                          | 1:1000 (WB), Abcam #ab108341       |
| PSA                         | 1:1000 (WB), Abcam #ab53774        |
| NEFH                        | 1:1000 (WB), Abcam #ab207176       |
| cleaved Caspase-3           | 1:1000 (WB), CST #9664T            |
| PIWIL2                      | 1:1000 (WB), Abcam #ab36764        |
| PIWIL4                      | 1:500 (WB), Santa Cruz #sc-517215  |
| Histone H3                  | 1:1000 (WB), Abclonal #A2348       |
| β-Actin                     | 1:5000 (WB), CST #4970             |
| GAPDH                       | 1:5000 (WB), Abcam #ab9485         |

|                            |                         |
|----------------------------|-------------------------|
| Anti-Rabbit IgG HRP-linked | 1:10000 (WB), CST #7074 |
| Anti-Mouse IgG HRP-linked  | 1:10000 (WB), CST #7076 |

**Table S7: The top 10 significantly upregulated piRNAs in CRPC**

| piRNA Name  | HSPCa group vs. Benign group |          |                  | CRPC group vs. HSPCa group |          |                  |
|-------------|------------------------------|----------|------------------|----------------------------|----------|------------------|
|             | log2FC                       | p-value  | adjusted p-value | log2FC                     | p-value  | adjusted p-value |
| piR-2545834 | 2.48                         | 8.44E-03 | 1.04E-02         | 4.95                       | 2.67E-07 | 1.88E-06         |
| piR-908852  | 2.94                         | 5.99E-04 | 1.02E-03         | 4.26                       | 6.57E-07 | 3.97E-06         |
| piR-60094   | 2.67                         | 5.15E-04 | 8.98E-04         | 3.78                       | 5.97E-08 | 5.22E-07         |
| piR-2651524 | 1.93                         | 1.39E-02 | 1.66E-02         | 3.60                       | 1.49E-06 | 7.83E-06         |
| piR-4447944 | 3.30                         | 4.11E-05 | 1.13E-04         | 3.57                       | 3.43E-08 | 3.24E-07         |
| piR-4419185 | 2.22                         | 1.10E-02 | 1.33E-02         | 3.55                       | 8.19E-06 | 3.26E-05         |
| piR-2856682 | 1.68                         | 2.58E-02 | 2.96E-02         | 3.25                       | 4.57E-05 | 1.34E-04         |
| piR-597820  | 3.34                         | 1.04E-04 | 2.43E-04         | 3.10                       | 9.47E-08 | 7.80E-07         |
| piR-1207232 | 4.59                         | 8.80E-07 | 4.80E-06         | 3.10                       | 9.18E-09 | 1.05E-07         |
| piR-2715339 | 2.94                         | 1.01E-03 | 1.59E-03         | 3.03                       | 2.70E-07 | 1.89E-06         |
